# Supplementary material for: Catalytic transformation of alcohols to carboxylic acid salts and H2 using water as the oxygen atom source
Source: Springer Nature journal article supplement (doi:10.1038/nchem.1536), 2013-01-04
Supplement: 41557_2013_BFnchem1536_MOESM5_ESM.mol [file 41557_2013_BFnchem1536_MOESM5_ESM.mol]

  ChemDraw12121212422D

 26 24  0  0  0  0  0  0  0  0999 V2000
   -1.1594   -0.9259    0.0000 C   0  0  0  0  0  0  0  0  0  0  0  0
   -0.7476   -0.2078    0.0000 N   0  5  0  0  0  0  0  0  0  0  0  0
   -1.1635    0.5079    0.0000 C   0  0  0  0  0  0  0  0  0  0  0  0
   -1.9913    0.5055    0.0000 C   0  0  0  0  0  0  0  0  0  0  0  0
   -2.4032   -0.2125    0.0000 C   0  0  0  0  0  0  0  0  0  0  0  0
   -1.9872   -0.9282    0.0000 C   0  0  0  0  0  0  0  0  0  0  0  0
   -0.7209    1.2797    0.0000 C   0  0  0  0  0  0  0  0  0  0  0  0
    0.1602    1.2498    0.0000 P   0  0  0  0  0  0  0  0  0  0  0  0
   -0.7449   -1.6391    0.0000 C   0  0  0  0  0  0  0  0  0  0  0  0
    0.0801   -1.6368    0.0000 N   0  0  0  0  0  0  0  0  0  0  0  0
   -1.1554   -2.3548    0.0000 C   0  0  0  0  0  0  0  0  0  0  0  0
   -0.7408   -3.0681    0.0000 C   0  0  0  0  0  0  0  0  0  0  0  0
    0.0842   -3.0657    0.0000 C   0  0  0  0  0  0  0  0  0  0  0  0
    0.4946   -2.3501    0.0000 C   0  0  0  0  0  0  0  0  0  0  0  0
    0.0110    2.2521    0.0000 C   0  0  0  0  0  0  0  0  0  0  0  0
   -0.7564    2.5549    0.0000 C   0  0  0  0  0  0  0  0  0  0  0  0
   -0.1105    3.0681    0.0000 C   0  0  0  0  0  0  0  0  0  0  0  0
    0.6569    2.7653    0.0000 C   0  0  0  0  0  0  0  0  0  0  0  0
    0.9546    1.5627    0.0000 C   0  0  0  0  0  0  0  0  0  0  0  0
    1.5678    1.0108    0.0000 C   0  0  0  0  0  0  0  0  0  0  0  0
    1.7526    1.7718    0.0000 C   0  0  0  0  0  0  0  0  0  0  0  0
    1.2184    2.3444    0.0000 C   0  0  0  0  0  0  0  0  0  0  0  0
    1.5755   -0.1712    0.0000 C   0  5  0  0  0  0  0  0  0  0  0  0
    2.4032   -0.1601    0.0000 O   0  3  0  0  0  0  0  0  0  0  0  0
    0.1440   -0.2287    0.0000 Ru  0  2  0  0  0  0  0  0  0  0  0  0
   -0.4577    0.5315    0.0000 H   0  5  0  0  0  0  0  0  0  0  0  0
  1  2  1  0      
  2  3  1  0      
  3  4  1  0      
  4  5  2  0      
  5  6  1  0      
  6  1  2  0      
  3  7  2  0      
  7  8  1  0      
  1  9  1  0      
  9 10  2  0      
  8 15  1  0      
  8 19  1  0      
  9 11  1  0      
 11 12  2  0      
 12 13  1  0      
 13 14  2  0      
 14 10  1  0      
 15 16  1  0      
 15 17  1  0      
 15 18  1  0      
 19 20  1  0      
 19 21  1  0      
 19 22  1  0      
 23 24  3  0      
M  CHG  5   2  -1  23  -1  24   1  25   2  26  -1
M  END
