# Supplementary material for: Catalytic transformation of alcohols to carboxylic acid salts and H2 using water as the oxygen atom source
Source: Springer Nature journal article supplement (doi:10.1038/nchem.1536), 2013-01-04
Supplement: 41557_2013_BFnchem1536_MOESM69_ESM.cif [file 41557_2013_BFnchem1536_MOESM69_ESM.cif]

 
data_m1242 
 
_audit_creation_method            SHELXL-97 
_chemical_name_systematic 
; 
 ? 
; 
_chemical_name_common             ? 
_chemical_melting_point           ? 
_chemical_formula_moiety           'C22 H31 N2 O3 P Ru'  
_chemical_formula_sum 
 'C22 H31 N2 O3 P Ru' 
_chemical_formula_weight          503.53 
 
loop_ 
 _atom_type_symbol 
 _atom_type_description 
 _atom_type_scat_dispersion_real 
 _atom_type_scat_dispersion_imag 
 _atom_type_scat_source 
 'C'  'C'   0.0033   0.0016 
 'International Tables Vol C Tables 4.2.6.8 and 6.1.1.4' 
 'H'  'H'   0.0000   0.0000 
 'International Tables Vol C Tables 4.2.6.8 and 6.1.1.4' 
 'N'  'N'   0.0061   0.0033 
 'International Tables Vol C Tables 4.2.6.8 and 6.1.1.4' 
 'O'  'O'   0.0106   0.0060 
 'International Tables Vol C Tables 4.2.6.8 and 6.1.1.4' 
 'P'  'P'   0.1023   0.0942 
 'International Tables Vol C Tables 4.2.6.8 and 6.1.1.4' 
 'Ru'  'Ru'  -1.2594   0.8363 
 'International Tables Vol C Tables 4.2.6.8 and 6.1.1.4' 
 
_symmetry_cell_setting           Monoclinic 
_symmetry_space_group_name_H-M    P2(1)/c 
_symmetry_space_group_name_Hall  -P2ybc
 
loop_ 
 _symmetry_equiv_pos_as_xyz 
 'x, y, z' 
 '-x, y+1/2, -z+1/2' 
 '-x, -y, -z' 
 'x, -y-1/2, z-1/2' 
 
_cell_length_a                    8.2460(16) 
_cell_length_b                    16.988(3) 
_cell_length_c                    16.411(3) 
_cell_angle_alpha                 90.00 
_cell_angle_beta                  101.30(3) 
_cell_angle_gamma                 90.00 
_cell_volume                      2254.4(8) 
_cell_formula_units_Z             4 
_cell_measurement_temperature     100(2) 
_cell_measurement_reflns_used     14574 
_cell_measurement_theta_min       2.15
_cell_measurement_theta_max       26.37 
 
_exptl_crystal_description        'prism'
_exptl_crystal_colour             'yellow'
_exptl_crystal_size_max           0.04 
_exptl_crystal_size_mid           0.04 
_exptl_crystal_size_min           0.03 
_exptl_crystal_density_meas       ? 
_exptl_crystal_density_diffrn     1.484 
_exptl_crystal_density_method     'not measured' 
_exptl_crystal_F_000              1040 
_exptl_absorpt_coefficient_mu     0.791 
_exptl_absorpt_correction_type    multi-scan 
_exptl_absorpt_correction_T_min   0.9690 
_exptl_absorpt_correction_T_max   0.9767 
_exptl_absorpt_process_details    'Bruker Apex2'
 
_exptl_special_details 
; 
 ? 
; 
 
_diffrn_ambient_temperature       100(2) 
_diffrn_radiation_wavelength      0.71073 
_diffrn_radiation_type            MoK\a 
_diffrn_radiation_source          'fine-focus sealed tube' 
_diffrn_radiation_monochromator   graphite 
_diffrn_measurement_device_type   'Bruker KappaApexII CCD'
_diffrn_measurement_method        'phi and omega scans' 
_diffrn_detector_area_resol_mean  ? 
_diffrn_standards_number          ? 
_diffrn_standards_interval_count  ? 
_diffrn_standards_interval_time   ? 
_diffrn_standards_decay_%         ? 
_diffrn_reflns_number           14574 
_diffrn_reflns_av_R_equivalents   0.0306 
_diffrn_reflns_av_sigmaI/netI     0.0354 
_diffrn_reflns_limit_h_min        -10 
_diffrn_reflns_limit_h_max        9 
_diffrn_reflns_limit_k_min        -19 
_diffrn_reflns_limit_k_max        21 
_diffrn_reflns_limit_l_min        -13 
_diffrn_reflns_limit_l_max        20 
_diffrn_reflns_theta_min          2.71 
_diffrn_reflns_theta_max          26.37 
_reflns_number_total              4609 
_reflns_number_gt                 3897 
_reflns_threshold_expression      >2sigma(I) 
 
_computing_data_collection        'Bruker Apex2'
_computing_cell_refinement        'Bruker Apex2' 
_computing_data_reduction         'Bruker Apex2'
_computing_structure_solution     'SHELXS-97 (Sheldrick, 1990)' 
_computing_structure_refinement   'SHELXL-97 (Sheldrick, 1997)' 
_computing_molecular_graphics     'Bruker SHELXTL' 
_computing_publication_material   'Bruker SHELXTL'
 
_refine_special_details 
; 
 Refinement of F^2^ against ALL reflections.  The weighted R-factor wR and 
 goodness of fit S are based on F^2^, conventional R-factors R are based 
 on F, with F set to zero for negative F^2^. The threshold expression of 
 F^2^ > 2sigma(F^2^) is used only for calculating R-factors(gt) etc. and is 
 not relevant to the choice of reflections for refinement.  R-factors based 
 on F^2^ are statistically about twice as large as those based on F, and R- 
 factors based on ALL data will be even larger. 
; 
 
_refine_ls_structure_factor_coef  Fsqd  
_refine_ls_matrix_type            full 
_refine_ls_weighting_scheme       calc  
_refine_ls_weighting_details 
 'calc w=1/[\s^2^(Fo^2^)+(0.0295P)^2^+7.6582P] where P=(Fo^2^+2Fc^2^)/3' 
_atom_sites_solution_primary      direct 
_atom_sites_solution_secondary    difmap 
_atom_sites_solution_hydrogens    geom 
_refine_ls_hydrogen_treatment     mixed 
_refine_ls_extinction_method      none 
_refine_ls_extinction_coef        ? 
_refine_ls_number_reflns          4609 
_refine_ls_number_parameters      360 
_refine_ls_number_restraints      25 
_refine_ls_R_factor_all           0.0640 
_refine_ls_R_factor_gt            0.0512 
_refine_ls_wR_factor_ref          0.1100 
_refine_ls_wR_factor_gt           0.1049 
_refine_ls_goodness_of_fit_ref    1.113 
_refine_ls_restrained_S_all       1.115 
_refine_ls_shift/su_max           0.000 
_refine_ls_shift/su_mean          0.000 
 
loop_ 
 _atom_site_label 
 _atom_site_type_symbol 
 _atom_site_fract_x 
 _atom_site_fract_y 
 _atom_site_fract_z 
 _atom_site_U_iso_or_equiv 
 _atom_site_adp_type 
 _atom_site_occupancy 
 _atom_site_symmetry_multiplicity 
 _atom_site_calc_flag 
 _atom_site_refinement_flags 
 _atom_site_disorder_assembly 
 _atom_site_disorder_group 
Ru1 Ru 0.28214(4) 0.67535(2) 0.38702(2) 0.02852(12) Uani 1 1 d . B . 
H1 H 0.462(6) 0.691(3) 0.432(3) 0.040(13) Uiso 1 1 d . . . 
P1 P 0.19519(15) 0.78130(8) 0.45127(8) 0.0378(3) Uani 1 1 d . . . 
O1 O 0.4166(5) 0.7668(3) 0.2603(3) 0.0702(13) Uani 1 1 d . B . 
O2 O 0.0395(4) 0.6350(2) 0.3192(2) 0.0449(9) Uani 1 1 d . . . 
O3 O 0.0726(7) 0.6641(3) 0.1919(2) 0.0852(16) Uani 1 1 d . . . 
N1 N 0.2208(5) 0.6134(2) 0.4869(2) 0.0323(8) Uani 1 1 d . . . 
N2 N 0.3473(5) 0.5580(2) 0.3644(2) 0.0330(8) Uani 1 1 d . . . 
C1 C 0.3583(6) 0.7306(3) 0.3066(3) 0.0463(13) Uani 1 1 d . . . 
C2 C -0.0071(9) 0.6400(3) 0.2419(3) 0.0582(16) Uani 1 1 d . A . 
C3A C -0.131(5) 0.595(3) 0.191(2) 0.072(11) Uani 0.27(3) 1 d PU A 1 
H3D H -0.2396 0.6086 0.2030 0.109 Uiso 0.27(3) 1 calc PR A 1 
H3E H -0.1098 0.5390 0.2010 0.109 Uiso 0.27(3) 1 calc PR A 1 
H3F H -0.1312 0.6068 0.1321 0.109 Uiso 0.27(3) 1 calc PR A 1 
C3 C -0.2039(18) 0.6232(8) 0.2139(8) 0.068(4) Uani 0.73(3) 1 d PU A 2 
H3A H -0.2347 0.6234 0.1531 0.102 Uiso 0.73(3) 1 calc PR A 2 
H3B H -0.2657 0.6643 0.2366 0.102 Uiso 0.73(3) 1 calc PR A 2 
H3C H -0.2300 0.5717 0.2351 0.102 Uiso 0.73(3) 1 calc PR A 2 
C4 C 0.4088(6) 0.5329(3) 0.2991(3) 0.0437(12) Uani 1 1 d . B . 
H4 H 0.4305 0.5705 0.2598 0.052 Uiso 1 1 calc R . . 
C5 C 0.4417(6) 0.4550(3) 0.2866(4) 0.0498(14) Uani 1 1 d . . . 
H5 H 0.4841 0.4392 0.2394 0.060 Uiso 1 1 calc R B . 
C6 C 0.4126(6) 0.4009(3) 0.3430(4) 0.0533(15) Uani 1 1 d . B . 
H6 H 0.4367 0.3469 0.3362 0.064 Uiso 1 1 calc R . . 
C7 C 0.3480(6) 0.4250(3) 0.4099(4) 0.0467(13) Uani 1 1 d . . . 
H7 H 0.3258 0.3876 0.4493 0.056 Uiso 1 1 calc R B . 
C8 C 0.3155(5) 0.5040(3) 0.4197(3) 0.0321(10) Uani 1 1 d . B . 
C9 C 0.2446(5) 0.5354(3) 0.4893(3) 0.0319(10) Uani 1 1 d . B . 
C10 C 0.2014(6) 0.4898(4) 0.5519(3) 0.0481(14) Uani 1 1 d . . . 
H10 H 0.2199 0.4346 0.5531 0.058 Uiso 1 1 calc R B . 
C11 C 0.1327(7) 0.5245(4) 0.6112(3) 0.0566(16) Uani 1 1 d . B . 
H11 H 0.0981 0.4936 0.6529 0.068 Uiso 1 1 calc R . . 
C12 C 0.1136(7) 0.6041(4) 0.6107(3) 0.0578(18) Uani 1 1 d . . . 
H12 H 0.0686 0.6291 0.6531 0.069 Uiso 1 1 calc R B . 
C13 C 0.1604(7) 0.6489(3) 0.5477(3) 0.0496(14) Uani 1 1 d D B . 
C14A C 0.0749(18) 0.7439(8) 0.5139(9) 0.039(4) Uani 0.337(6) 1 d PD B 1 
H14C H -0.0405 0.7383 0.4832 0.047 Uiso 0.337(6) 1 calc PR B 1 
H14D H 0.0757 0.7788 0.5622 0.047 Uiso 0.337(6) 1 calc PR B 1 
C15A C 0.372(3) 0.8417(13) 0.5112(18) 0.046(3) Uani 0.337(6) 1 d P B 1 
C16A C 0.316(11) 0.914(6) 0.560(7) 0.059(5) Uani 0.337(6) 1 d P B 1 
H16D H 0.4120 0.9338 0.5998 0.089 Uiso 0.337(6) 1 calc PR B 1 
H16E H 0.2311 0.8966 0.5903 0.089 Uiso 0.337(6) 1 calc PR B 1 
H16F H 0.2718 0.9554 0.5209 0.089 Uiso 0.337(6) 1 calc PR B 1 
C17A C 0.499(4) 0.8669(18) 0.4628(14) 0.080(10) Uani 0.337(6) 1 d P B 1 
H17D H 0.4477 0.9010 0.4168 0.119 Uiso 0.337(6) 1 calc PR B 1 
H17E H 0.5458 0.8203 0.4406 0.119 Uiso 0.337(6) 1 calc PR B 1 
H17F H 0.5876 0.8958 0.4994 0.119 Uiso 0.337(6) 1 calc PR B 1 
C18A C 0.439(2) 0.7855(9) 0.5816(9) 0.045(4) Uani 0.337(6) 1 d P B 1 
H18D H 0.4672 0.7352 0.5585 0.068 Uiso 0.337(6) 1 calc PR B 1 
H18E H 0.3549 0.7766 0.6153 0.068 Uiso 0.337(6) 1 calc PR B 1 
H18F H 0.5381 0.8082 0.6163 0.068 Uiso 0.337(6) 1 calc PR B 1 
C19A C 0.051(2) 0.8663(9) 0.3799(8) 0.043(4) Uani 0.337(6) 1 d P B 1 
C20A C -0.065(6) 0.824(3) 0.309(3) 0.050(10) Uani 0.337(6) 1 d P B 1 
H20D H -0.1374 0.8630 0.2753 0.074 Uiso 0.337(6) 1 calc PR B 1 
H20E H -0.1322 0.7857 0.3315 0.074 Uiso 0.337(6) 1 calc PR B 1 
H20F H 0.0007 0.7972 0.2733 0.074 Uiso 0.337(6) 1 calc PR B 1 
C21A C 0.148(3) 0.9255(9) 0.3374(10) 0.058(5) Uani 0.337(6) 1 d P B 1 
H21D H 0.0708 0.9535 0.2938 0.087 Uiso 0.337(6) 1 calc PR B 1 
H21E H 0.2299 0.8976 0.3127 0.087 Uiso 0.337(6) 1 calc PR B 1 
H21F H 0.2033 0.9634 0.3786 0.087 Uiso 0.337(6) 1 calc PR B 1 
C22A C -0.058(3) 0.9095(15) 0.4319(16) 0.059(6) Uani 0.337(6) 1 d P B 1 
H22D H 0.0117 0.9391 0.4766 0.089 Uiso 0.337(6) 1 calc PR B 1 
H22E H -0.1238 0.8708 0.4560 0.089 Uiso 0.337(6) 1 calc PR B 1 
H22F H -0.1329 0.9458 0.3962 0.089 Uiso 0.337(6) 1 calc PR B 1 
C14 C 0.1865(10) 0.7316(4) 0.5581(4) 0.0358(18) Uani 0.663(6) 1 d P B 2 
H14A H 0.2916 0.7413 0.5977 0.043 Uiso 0.663(6) 1 calc PR B 2 
H14B H 0.0956 0.7551 0.5814 0.043 Uiso 0.663(6) 1 calc PR B 2 
C15 C 0.3294(15) 0.8658(6) 0.4892(8) 0.046(3) Uani 0.663(6) 1 d P B 2 
C16 C 0.291(5) 0.911(3) 0.561(3) 0.059(5) Uani 0.663(6) 1 d PU B 2 
H16A H 0.3003 0.8758 0.6092 0.089 Uiso 0.663(6) 1 calc PR B 2 
H16B H 0.1786 0.9318 0.5467 0.089 Uiso 0.663(6) 1 calc PR B 2 
H16C H 0.3698 0.9544 0.5746 0.089 Uiso 0.663(6) 1 calc PR B 2 
C17 C 0.5071(15) 0.8411(8) 0.5058(10) 0.078(4) Uani 0.663(6) 1 d PU B 2 
H17A H 0.5775 0.8866 0.5247 0.117 Uiso 0.663(6) 1 calc PR B 2 
H17B H 0.5352 0.8201 0.4547 0.117 Uiso 0.663(6) 1 calc PR B 2 
H17C H 0.5250 0.8003 0.5488 0.117 Uiso 0.663(6) 1 calc PR B 2 
C18 C 0.3080(15) 0.9236(6) 0.4110(7) 0.074(3) Uani 0.663(6) 1 d P B 2 
H18A H 0.1973 0.9471 0.4014 0.112 Uiso 0.663(6) 1 calc PR B 2 
H18B H 0.3220 0.8938 0.3617 0.112 Uiso 0.663(6) 1 calc PR B 2 
H18C H 0.3915 0.9653 0.4220 0.112 Uiso 0.663(6) 1 calc PR B 2 
C19 C -0.0232(9) 0.8094(4) 0.4144(5) 0.0386(18) Uani 0.663(6) 1 d P B 2 
C20 C -0.041(3) 0.8274(11) 0.3232(16) 0.055(7) Uani 0.663(6) 1 d P B 2 
H20A H -0.1587 0.8309 0.2976 0.082 Uiso 0.663(6) 1 calc PR B 2 
H20B H 0.0105 0.7853 0.2963 0.082 Uiso 0.663(6) 1 calc PR B 2 
H20C H 0.0133 0.8775 0.3163 0.082 Uiso 0.663(6) 1 calc PR B 2 
C21 C -0.1337(9) 0.7386(4) 0.4261(5) 0.045(2) Uani 0.663(6) 1 d P B 2 
H21A H -0.1296 0.7300 0.4855 0.068 Uiso 0.663(6) 1 calc PR B 2 
H21B H -0.0937 0.6914 0.4019 0.068 Uiso 0.663(6) 1 calc PR B 2 
H21C H -0.2479 0.7493 0.3983 0.068 Uiso 0.663(6) 1 calc PR B 2 
C22 C -0.0836(18) 0.8807(6) 0.4582(9) 0.057(3) Uani 0.663(6) 1 d P B 2 
H22A H -0.1994 0.8917 0.4333 0.085 Uiso 0.663(6) 1 calc PR B 2 
H22B H -0.0157 0.9267 0.4518 0.085 Uiso 0.663(6) 1 calc PR B 2 
H22C H -0.0743 0.8690 0.5174 0.085 Uiso 0.663(6) 1 calc PR B 2 
 
loop_ 
 _atom_site_aniso_label 
 _atom_site_aniso_U_11 
 _atom_site_aniso_U_22 
 _atom_site_aniso_U_33 
 _atom_site_aniso_U_23 
 _atom_site_aniso_U_13 
 _atom_site_aniso_U_12 
Ru1 0.03222(19) 0.02701(19) 0.03107(18) -0.00517(16) 0.01777(14) -0.00440(16) 
P1 0.0350(6) 0.0357(7) 0.0446(7) -0.0155(6) 0.0125(5) 0.0007(5) 
O1 0.075(3) 0.071(3) 0.078(3) 0.033(2) 0.047(2) 0.003(2) 
O2 0.055(2) 0.045(2) 0.0306(17) 0.0077(15) -0.0007(15) -0.0166(17) 
O3 0.133(5) 0.092(4) 0.031(2) 0.012(2) 0.019(3) 0.011(3) 
N1 0.036(2) 0.043(2) 0.0199(17) -0.0094(16) 0.0107(15) -0.0131(17) 
N2 0.038(2) 0.032(2) 0.0297(19) -0.0067(16) 0.0079(16) 0.0020(17) 
C1 0.047(3) 0.040(3) 0.060(3) 0.005(3) 0.029(3) 0.000(2) 
C2 0.101(5) 0.036(3) 0.032(3) -0.001(2) -0.001(3) -0.008(3) 
C3A 0.065(17) 0.096(19) 0.051(13) 0.000(13) -0.002(12) -0.004(14) 
C3 0.066(8) 0.071(7) 0.052(6) 0.001(5) -0.023(5) 0.002(5) 
C4 0.050(3) 0.049(3) 0.034(2) -0.010(2) 0.011(2) 0.008(2) 
C5 0.041(3) 0.053(3) 0.053(3) -0.028(3) 0.003(2) 0.011(2) 
C6 0.038(3) 0.039(3) 0.079(4) -0.016(3) 0.000(3) 0.009(2) 
C7 0.035(3) 0.033(3) 0.065(3) 0.008(3) -0.007(2) 0.004(2) 
C8 0.024(2) 0.035(2) 0.032(2) 0.002(2) -0.0061(17) 0.0006(18) 
C9 0.026(2) 0.038(3) 0.028(2) 0.006(2) -0.0028(17) -0.0055(19) 
C10 0.036(3) 0.067(4) 0.038(3) 0.023(3) 0.002(2) -0.006(3) 
C11 0.042(3) 0.088(5) 0.037(3) 0.027(3) 0.003(2) -0.010(3) 
C12 0.042(3) 0.112(6) 0.023(2) -0.013(3) 0.015(2) -0.025(3) 
C13 0.060(3) 0.053(3) 0.044(3) -0.020(2) 0.030(3) -0.024(3) 
C14A 0.039(8) 0.049(9) 0.034(8) -0.010(7) 0.017(7) -0.003(7) 
C15A 0.055(7) 0.021(6) 0.066(8) -0.008(5) 0.019(6) -0.008(4) 
C16A 0.081(11) 0.035(5) 0.062(4) -0.019(3) 0.012(8) -0.009(8) 
C17A 0.100(19) 0.10(2) 0.051(13) -0.043(14) 0.037(15) -0.052(17) 
C18A 0.052(9) 0.044(9) 0.033(8) -0.010(7) -0.005(7) -0.012(7) 
C19A 0.057(9) 0.046(9) 0.020(6) -0.012(6) -0.008(6) 0.011(8) 
C20A 0.036(11) 0.07(2) 0.038(15) 0.034(13) -0.003(12) 0.000(12) 
C21A 0.108(15) 0.030(8) 0.043(9) 0.005(7) 0.029(10) 0.016(9) 
C22A 0.071(15) 0.053(16) 0.058(15) -0.004(11) 0.024(12) 0.026(13) 
C14 0.052(5) 0.030(4) 0.030(4) -0.003(3) 0.019(3) 0.011(3) 
C15 0.055(7) 0.021(6) 0.066(8) -0.008(5) 0.019(6) -0.008(4) 
C16 0.081(11) 0.035(5) 0.062(4) -0.019(3) 0.012(8) -0.009(8) 
C17 0.048(6) 0.068(8) 0.116(11) -0.055(8) 0.015(7) -0.021(5) 
C18 0.104(9) 0.045(5) 0.081(7) 0.007(5) 0.036(7) -0.032(6) 
C19 0.043(4) 0.024(4) 0.051(4) 0.003(3) 0.014(3) 0.013(3) 
C20 0.075(15) 0.034(7) 0.051(11) 0.011(6) 0.001(9) 0.036(8) 
C21 0.030(4) 0.040(4) 0.070(5) 0.001(4) 0.021(4) 0.009(3) 
C22 0.064(7) 0.035(6) 0.076(9) 0.001(5) 0.026(7) 0.024(5) 
 
_geom_special_details 
; 
 All esds (except the esd in the dihedral angle between two l.s. planes) 
 are estimated using the full covariance matrix.  The cell esds are taken 
 into account individually in the estimation of esds in distances, angles 
 and torsion angles; correlations between esds in cell parameters are only 
 used when they are defined by crystal symmetry.  An approximate (isotropic) 
 treatment of cell esds is used for estimating esds involving l.s. planes. 
; 
 
loop_ 
 _geom_bond_atom_site_label_1 
 _geom_bond_atom_site_label_2 
 _geom_bond_distance 
 _geom_bond_site_symmetry_2 
 _geom_bond_publ_flag 
Ru1 C1 1.828(5) . ? 
Ru1 N1 2.092(4) . ? 
Ru1 N2 2.117(4) . ? 
Ru1 O2 2.200(3) . ? 
Ru1 P1 2.2719(13) . ? 
Ru1 H1 1.55(5) . ? 
P1 C14A 1.686(13) . ? 
P1 C15 1.845(12) . ? 
P1 C19 1.847(7) . ? 
P1 C15A 1.89(3) . ? 
P1 C14 1.959(7) . ? 
P1 C19A 2.078(15) . ? 
O1 C1 1.153(6) . ? 
O2 C2 1.254(6) . ? 
O3 C2 1.219(7) . ? 
N1 C9 1.338(6) . ? 
N1 C13 1.342(6) . ? 
N2 C4 1.343(6) . ? 
N2 C8 1.351(6) . ? 
C2 C3A 1.42(3) . ? 
C2 C3 1.623(15) . ? 
C3A H3D 0.9800 . ? 
C3A H3E 0.9800 . ? 
C3A H3F 0.9800 . ? 
C3 H3A 0.9800 . ? 
C3 H3B 0.9800 . ? 
C3 H3C 0.9800 . ? 
C4 C5 1.374(7) . ? 
C4 H4 0.9500 . ? 
C5 C6 1.358(8) . ? 
C5 H5 0.9500 . ? 
C6 C7 1.374(8) . ? 
C6 H6 0.9500 . ? 
C7 C8 1.385(7) . ? 
C7 H7 0.9500 . ? 
C8 C9 1.480(6) . ? 
C9 C10 1.388(6) . ? 
C10 C11 1.354(8) . ? 
C10 H10 0.9500 . ? 
C11 C12 1.360(9) . ? 
C11 H11 0.9500 . ? 
C12 C13 1.399(7) . ? 
C12 H12 0.9500 . ? 
C13 C14 1.426(9) . ? 
C13 C14A 1.803(13) . ? 
C14A H14C 0.9900 . ? 
C14A H14D 0.9900 . ? 
C15A C17A 1.50(4) . ? 
C15A C18A 1.52(3) . ? 
C15A C16A 1.58(11) . ? 
C16A H16D 0.9800 . ? 
C16A H16E 0.9800 . ? 
C16A H16F 0.9800 . ? 
C17A H17D 0.9800 . ? 
C17A H17E 0.9800 . ? 
C17A H17F 0.9800 . ? 
C18A H18D 0.9800 . ? 
C18A H18E 0.9800 . ? 
C18A H18F 0.9800 . ? 
C19A C21A 1.53(2) . ? 
C19A C20A 1.54(6) . ? 
C19A C22A 1.55(3) . ? 
C20A H20D 0.9800 . ? 
C20A H20E 0.9800 . ? 
C20A H20F 0.9800 . ? 
C21A H21D 0.9800 . ? 
C21A H21E 0.9800 . ? 
C21A H21F 0.9800 . ? 
C22A H22D 0.9800 . ? 
C22A H22E 0.9800 . ? 
C22A H22F 0.9800 . ? 
C14 H14A 0.9900 . ? 
C14 H14B 0.9900 . ? 
C15 C16 1.49(6) . ? 
C15 C17 1.497(18) . ? 
C15 C18 1.597(15) . ? 
C16 H16A 0.9800 . ? 
C16 H16B 0.9800 . ? 
C16 H16C 0.9800 . ? 
C17 H17A 0.9800 . ? 
C17 H17B 0.9800 . ? 
C17 H17C 0.9800 . ? 
C18 H18A 0.9800 . ? 
C18 H18B 0.9800 . ? 
C18 H18C 0.9800 . ? 
C19 C20 1.51(3) . ? 
C19 C22 1.540(14) . ? 
C19 C21 1.544(10) . ? 
C20 H20A 0.9800 . ? 
C20 H20B 0.9800 . ? 
C20 H20C 0.9800 . ? 
C21 H21A 0.9800 . ? 
C21 H21B 0.9800 . ? 
C21 H21C 0.9800 . ? 
C22 H22A 0.9800 . ? 
C22 H22B 0.9800 . ? 
C22 H22C 0.9800 . ? 
 
loop_ 
 _geom_angle_atom_site_label_1 
 _geom_angle_atom_site_label_2 
 _geom_angle_atom_site_label_3 
 _geom_angle 
 _geom_angle_site_symmetry_1 
 _geom_angle_site_symmetry_3 
 _geom_angle_publ_flag 
C1 Ru1 N1 173.8(2) . . ? 
C1 Ru1 N2 102.84(19) . . ? 
N1 Ru1 N2 76.82(14) . . ? 
C1 Ru1 O2 101.6(2) . . ? 
N1 Ru1 O2 84.50(13) . . ? 
N2 Ru1 O2 81.64(14) . . ? 
C1 Ru1 P1 96.47(17) . . ? 
N1 Ru1 P1 83.58(11) . . ? 
N2 Ru1 P1 160.33(11) . . ? 
O2 Ru1 P1 98.25(11) . . ? 
C1 Ru1 H1 80.0(18) . . ? 
N1 Ru1 H1 93.8(17) . . ? 
N2 Ru1 H1 89.4(17) . . ? 
O2 Ru1 H1 171.0(17) . . ? 
P1 Ru1 H1 90.3(17) . . ? 
C14A P1 C15 118.3(6) . . ? 
C14A P1 C19 69.2(6) . . ? 
C15 P1 C19 113.0(4) . . ? 
C14A P1 C15A 111.8(10) . . ? 
C19 P1 C15A 129.2(7) . . ? 
C15 P1 C14 99.1(4) . . ? 
C19 P1 C14 101.5(3) . . ? 
C15A P1 C14 85.8(8) . . ? 
C14A P1 C19A 105.5(7) . . ? 
C15 P1 C19A 83.6(5) . . ? 
C15A P1 C19A 102.2(8) . . ? 
C14 P1 C19A 133.4(5) . . ? 
C14A P1 Ru1 105.1(4) . . ? 
C15 P1 Ru1 123.4(4) . . ? 
C19 P1 Ru1 115.4(2) . . ? 
C15A P1 Ru1 113.0(8) . . ? 
C14 P1 Ru1 98.3(2) . . ? 
C19A P1 Ru1 119.1(4) . . ? 
C2 O2 Ru1 123.9(4) . . ? 
C9 N1 C13 119.9(4) . . ? 
C9 N1 Ru1 117.6(3) . . ? 
C13 N1 Ru1 122.5(3) . . ? 
C4 N2 C8 118.3(4) . . ? 
C4 N2 Ru1 126.0(3) . . ? 
C8 N2 Ru1 115.6(3) . . ? 
O1 C1 Ru1 174.8(5) . . ? 
O3 C2 O2 127.3(6) . . ? 
O3 C2 C3A 101.7(16) . . ? 
O2 C2 C3A 127.4(14) . . ? 
O3 C2 C3 120.6(7) . . ? 
O2 C2 C3 111.4(7) . . ? 
C2 C3A H3D 109.5 . . ? 
C2 C3A H3E 109.5 . . ? 
C2 C3A H3F 109.5 . . ? 
C2 C3 H3A 109.5 . . ? 
C2 C3 H3B 109.5 . . ? 
H3A C3 H3B 109.5 . . ? 
C2 C3 H3C 109.5 . . ? 
H3A C3 H3C 109.5 . . ? 
H3B C3 H3C 109.5 . . ? 
N2 C4 C5 122.8(5) . . ? 
N2 C4 H4 118.6 . . ? 
C5 C4 H4 118.6 . . ? 
C6 C5 C4 119.0(5) . . ? 
C6 C5 H5 120.5 . . ? 
C4 C5 H5 120.5 . . ? 
C5 C6 C7 119.4(5) . . ? 
C5 C6 H6 120.3 . . ? 
C7 C6 H6 120.3 . . ? 
C6 C7 C8 119.8(5) . . ? 
C6 C7 H7 120.1 . . ? 
C8 C7 H7 120.1 . . ? 
N2 C8 C7 120.8(5) . . ? 
N2 C8 C9 115.6(4) . . ? 
C7 C8 C9 123.6(5) . . ? 
N1 C9 C10 121.1(5) . . ? 
N1 C9 C8 114.4(4) . . ? 
C10 C9 C8 124.6(5) . . ? 
C11 C10 C9 119.6(6) . . ? 
C11 C10 H10 120.2 . . ? 
C9 C10 H10 120.2 . . ? 
C10 C11 C12 119.5(5) . . ? 
C10 C11 H11 120.2 . . ? 
C12 C11 H11 120.2 . . ? 
C11 C12 C13 119.8(5) . . ? 
C11 C12 H12 120.1 . . ? 
C13 C12 H12 120.1 . . ? 
N1 C13 C12 120.0(5) . . ? 
N1 C13 C14 117.6(5) . . ? 
C12 C13 C14 120.3(5) . . ? 
N1 C13 C14A 110.7(6) . . ? 
C12 C13 C14A 124.5(6) . . ? 
P1 C14A C13 106.5(7) . . ? 
P1 C14A H14C 110.4 . . ? 
C13 C14A H14C 110.4 . . ? 
P1 C14A H14D 110.4 . . ? 
C13 C14A H14D 110.4 . . ? 
H14C C14A H14D 108.6 . . ? 
C17A C15A C18A 113(2) . . ? 
C17A C15A C16A 111(4) . . ? 
C18A C15A C16A 101(4) . . ? 
C17A C15A P1 115(2) . . ? 
C18A C15A P1 100.6(14) . . ? 
C16A C15A P1 115(4) . . ? 
C21A C19A C20A 105.1(19) . . ? 
C21A C19A C22A 110.6(15) . . ? 
C20A C19A C22A 107(2) . . ? 
C21A C19A P1 115.1(11) . . ? 
C20A C19A P1 108.0(18) . . ? 
C22A C19A P1 110.4(12) . . ? 
C13 C14 P1 110.4(4) . . ? 
C13 C14 H14A 109.6 . . ? 
P1 C14 H14A 109.6 . . ? 
C13 C14 H14B 109.6 . . ? 
P1 C14 H14B 109.6 . . ? 
H14A C14 H14B 108.1 . . ? 
C16 C15 C17 110.6(19) . . ? 
C16 C15 C18 108.3(19) . . ? 
C17 C15 C18 105.6(11) . . ? 
C16 C15 P1 117.4(19) . . ? 
C17 C15 P1 110.1(7) . . ? 
C18 C15 P1 104.0(8) . . ? 
C15 C16 H16A 109.5 . . ? 
C15 C16 H16B 109.5 . . ? 
H16A C16 H16B 109.5 . . ? 
C15 C16 H16C 109.5 . . ? 
H16A C16 H16C 109.5 . . ? 
H16B C16 H16C 109.5 . . ? 
C15 C17 H17A 109.5 . . ? 
C15 C17 H17B 109.5 . . ? 
H17A C17 H17B 109.5 . . ? 
C15 C17 H17C 109.5 . . ? 
H17A C17 H17C 109.5 . . ? 
H17B C17 H17C 109.5 . . ? 
C15 C18 H18A 109.5 . . ? 
C15 C18 H18B 109.5 . . ? 
H18A C18 H18B 109.5 . . ? 
C15 C18 H18C 109.5 . . ? 
H18A C18 H18C 109.5 . . ? 
H18B C18 H18C 109.5 . . ? 
C20 C19 C22 109.1(9) . . ? 
C20 C19 C21 109.6(12) . . ? 
C22 C19 C21 107.6(7) . . ? 
C20 C19 P1 106.1(10) . . ? 
C22 C19 P1 115.8(7) . . ? 
C21 C19 P1 108.6(5) . . ? 
C19 C20 H20A 109.5 . . ? 
C19 C20 H20B 109.5 . . ? 
H20A C20 H20B 109.5 . . ? 
C19 C20 H20C 109.5 . . ? 
H20A C20 H20C 109.5 . . ? 
H20B C20 H20C 109.5 . . ? 
C19 C21 H21A 109.5 . . ? 
C19 C21 H21B 109.5 . . ? 
H21A C21 H21B 109.5 . . ? 
C19 C21 H21C 109.5 . . ? 
H21A C21 H21C 109.5 . . ? 
H21B C21 H21C 109.5 . . ? 
C19 C22 H22A 109.5 . . ? 
C19 C22 H22B 109.5 . . ? 
H22A C22 H22B 109.5 . . ? 
C19 C22 H22C 109.5 . . ? 
H22A C22 H22C 109.5 . . ? 
H22B C22 H22C 109.5 . . ? 
 
loop_ 
 _geom_torsion_atom_site_label_1 
 _geom_torsion_atom_site_label_2 
 _geom_torsion_atom_site_label_3 
 _geom_torsion_atom_site_label_4 
 _geom_torsion 
 _geom_torsion_site_symmetry_1 
 _geom_torsion_site_symmetry_2 
 _geom_torsion_site_symmetry_3 
 _geom_torsion_site_symmetry_4 
 _geom_torsion_publ_flag 
C1 Ru1 P1 C14A 165.9(6) . . . . ? 
N1 Ru1 P1 C14A -20.4(6) . . . . ? 
N2 Ru1 P1 C14A -25.1(6) . . . . ? 
O2 Ru1 P1 C14A 63.1(6) . . . . ? 
C1 Ru1 P1 C15 -54.2(5) . . . . ? 
N1 Ru1 P1 C15 119.6(4) . . . . ? 
N2 Ru1 P1 C15 114.8(5) . . . . ? 
O2 Ru1 P1 C15 -156.9(4) . . . . ? 
C1 Ru1 P1 C19 92.1(3) . . . . ? 
N1 Ru1 P1 C19 -94.1(3) . . . . ? 
N2 Ru1 P1 C19 -98.9(4) . . . . ? 
O2 Ru1 P1 C19 -10.7(3) . . . . ? 
C1 Ru1 P1 C15A -71.9(9) . . . . ? 
N1 Ru1 P1 C15A 101.9(8) . . . . ? 
N2 Ru1 P1 C15A 97.1(9) . . . . ? 
O2 Ru1 P1 C15A -174.7(8) . . . . ? 
C1 Ru1 P1 C14 -160.8(3) . . . . ? 
N1 Ru1 P1 C14 12.9(3) . . . . ? 
N2 Ru1 P1 C14 8.1(4) . . . . ? 
O2 Ru1 P1 C14 96.4(3) . . . . ? 
C1 Ru1 P1 C19A 48.1(6) . . . . ? 
N1 Ru1 P1 C19A -138.1(6) . . . . ? 
N2 Ru1 P1 C19A -142.9(6) . . . . ? 
O2 Ru1 P1 C19A -54.7(6) . . . . ? 
C1 Ru1 O2 C2 11.1(5) . . . . ? 
N1 Ru1 O2 C2 -167.9(5) . . . . ? 
N2 Ru1 O2 C2 -90.4(5) . . . . ? 
P1 Ru1 O2 C2 109.5(4) . . . . ? 
N2 Ru1 N1 C9 -1.6(3) . . . . ? 
O2 Ru1 N1 C9 81.1(3) . . . . ? 
P1 Ru1 N1 C9 -179.9(3) . . . . ? 
N2 Ru1 N1 C13 178.1(4) . . . . ? 
O2 Ru1 N1 C13 -99.2(4) . . . . ? 
P1 Ru1 N1 C13 -0.2(4) . . . . ? 
C1 Ru1 N2 C4 -7.9(4) . . . . ? 
N1 Ru1 N2 C4 178.5(4) . . . . ? 
O2 Ru1 N2 C4 92.2(4) . . . . ? 
P1 Ru1 N2 C4 -176.7(3) . . . . ? 
C1 Ru1 N2 C8 175.4(3) . . . . ? 
N1 Ru1 N2 C8 1.8(3) . . . . ? 
O2 Ru1 N2 C8 -84.5(3) . . . . ? 
P1 Ru1 N2 C8 6.7(6) . . . . ? 
Ru1 O2 C2 O3 3.2(9) . . . . ? 
Ru1 O2 C2 C3A 158(3) . . . . ? 
Ru1 O2 C2 C3 -167.5(6) . . . . ? 
C8 N2 C4 C5 -0.5(7) . . . . ? 
Ru1 N2 C4 C5 -177.1(4) . . . . ? 
N2 C4 C5 C6 -0.7(8) . . . . ? 
C4 C5 C6 C7 1.3(8) . . . . ? 
C5 C6 C7 C8 -0.8(8) . . . . ? 
C4 N2 C8 C7 1.0(6) . . . . ? 
Ru1 N2 C8 C7 177.9(3) . . . . ? 
C4 N2 C8 C9 -178.7(4) . . . . ? 
Ru1 N2 C8 C9 -1.8(5) . . . . ? 
C6 C7 C8 N2 -0.3(7) . . . . ? 
C6 C7 C8 C9 179.4(4) . . . . ? 
C13 N1 C9 C10 2.7(7) . . . . ? 
Ru1 N1 C9 C10 -177.7(3) . . . . ? 
C13 N1 C9 C8 -178.6(4) . . . . ? 
Ru1 N1 C9 C8 1.1(5) . . . . ? 
N2 C8 C9 N1 0.5(6) . . . . ? 
C7 C8 C9 N1 -179.2(4) . . . . ? 
N2 C8 C9 C10 179.2(4) . . . . ? 
C7 C8 C9 C10 -0.5(7) . . . . ? 
N1 C9 C10 C11 0.6(7) . . . . ? 
C8 C9 C10 C11 -178.0(4) . . . . ? 
C9 C10 C11 C12 -2.9(8) . . . . ? 
C10 C11 C12 C13 1.9(8) . . . . ? 
C9 N1 C13 C12 -3.6(7) . . . . ? 
Ru1 N1 C13 C12 176.7(4) . . . . ? 
C9 N1 C13 C14 160.1(6) . . . . ? 
Ru1 N1 C13 C14 -19.5(7) . . . . ? 
C9 N1 C13 C14A -160.3(6) . . . . ? 
Ru1 N1 C13 C14A 20.0(7) . . . . ? 
C11 C12 C13 N1 1.3(8) . . . . ? 
C11 C12 C13 C14 -161.9(6) . . . . ? 
C11 C12 C13 C14A 154.7(8) . . . . ? 
C15 P1 C14A C13 -109.7(7) . . . . ? 
C19 P1 C14A C13 144.5(9) . . . . ? 
C15A P1 C14A C13 -90.3(10) . . . . ? 
C14 P1 C14A C13 -49.3(7) . . . . ? 
C19A P1 C14A C13 159.3(7) . . . . ? 
Ru1 P1 C14A C13 32.7(8) . . . . ? 
N1 C13 C14A P1 -35.4(10) . . . . ? 
C12 C13 C14A P1 169.1(6) . . . . ? 
C14 C13 C14A P1 73.3(9) . . . . ? 
C14A P1 C15A C17A 171.0(19) . . . . ? 
C15 P1 C15A C17A -75(4) . . . . ? 
C19 P1 C15A C17A -109(2) . . . . ? 
C14 P1 C15A C17A 150(2) . . . . ? 
C19A P1 C15A C17A -77(2) . . . . ? 
Ru1 P1 C15A C17A 53(2) . . . . ? 
C14A P1 C15A C18A 49.0(16) . . . . ? 
C15 P1 C15A C18A 163(5) . . . . ? 
C19 P1 C15A C18A 129.4(11) . . . . ? 
C14 P1 C15A C18A 27.9(14) . . . . ? 
C19A P1 C15A C18A 161.4(13) . . . . ? 
Ru1 P1 C15A C18A -69.4(16) . . . . ? 
C14A P1 C15A C16A -59(4) . . . . ? 
C15 P1 C15A C16A 55(5) . . . . ? 
C19 P1 C15A C16A 21(4) . . . . ? 
C14 P1 C15A C16A -80(4) . . . . ? 
C19A P1 C15A C16A 53(4) . . . . ? 
Ru1 P1 C15A C16A -177(4) . . . . ? 
C14A P1 C19A C21A 162.2(11) . . . . ? 
C15 P1 C19A C21A 44.6(11) . . . . ? 
C19 P1 C19A C21A -175.6(14) . . . . ? 
C15A P1 C19A C21A 45.2(14) . . . . ? 
C14 P1 C19A C21A 141.1(9) . . . . ? 
Ru1 P1 C19A C21A -80.1(11) . . . . ? 
C14A P1 C19A C20A -80.8(19) . . . . ? 
C15 P1 C19A C20A 161.6(19) . . . . ? 
C19 P1 C19A C20A -58.6(18) . . . . ? 
C15A P1 C19A C20A 162(2) . . . . ? 
C14 P1 C19A C20A -101.9(18) . . . . ? 
Ru1 P1 C19A C20A 36.8(19) . . . . ? 
C14A P1 C19A C22A 36.1(16) . . . . ? 
C15 P1 C19A C22A -81.4(15) . . . . ? 
C19 P1 C19A C22A 58.4(14) . . . . ? 
C15A P1 C19A C22A -80.9(17) . . . . ? 
C14 P1 C19A C22A 15.0(17) . . . . ? 
Ru1 P1 C19A C22A 153.8(13) . . . . ? 
N1 C13 C14 P1 30.6(8) . . . . ? 
C12 C13 C14 P1 -165.8(5) . . . . ? 
C14A C13 C14 P1 -57.5(8) . . . . ? 
C14A P1 C14 C13 78.7(10) . . . . ? 
C15 P1 C14 C13 -152.1(6) . . . . ? 
C19 P1 C14 C13 91.9(5) . . . . ? 
C15A P1 C14 C13 -138.9(9) . . . . ? 
C19A P1 C14 C13 118.2(7) . . . . ? 
Ru1 P1 C14 C13 -26.2(5) . . . . ? 
C14A P1 C15 C16 -17(2) . . . . ? 
C19 P1 C15 C16 61(2) . . . . ? 
C15A P1 C15 C16 -91(4) . . . . ? 
C14 P1 C15 C16 -46(2) . . . . ? 
C19A P1 C15 C16 87(2) . . . . ? 
Ru1 P1 C15 C16 -152(2) . . . . ? 
C14A P1 C15 C17 110.7(11) . . . . ? 
C19 P1 C15 C17 -171.4(9) . . . . ? 
C15A P1 C15 C17 36(3) . . . . ? 
C14 P1 C15 C17 81.8(10) . . . . ? 
C19A P1 C15 C17 -145.2(11) . . . . ? 
Ru1 P1 C15 C17 -24.5(12) . . . . ? 
C14A P1 C15 C18 -136.6(8) . . . . ? 
C19 P1 C15 C18 -58.7(8) . . . . ? 
C15A P1 C15 C18 149(4) . . . . ? 
C14 P1 C15 C18 -165.4(7) . . . . ? 
C19A P1 C15 C18 -32.4(8) . . . . ? 
Ru1 P1 C15 C18 88.3(7) . . . . ? 
C14A P1 C19 C20 -156.8(11) . . . . ? 
C15 P1 C19 C20 90.3(11) . . . . ? 
C15A P1 C19 C20 101.4(15) . . . . ? 
C14 P1 C19 C20 -164.5(10) . . . . ? 
C19A P1 C19 C20 46.1(11) . . . . ? 
Ru1 P1 C19 C20 -59.4(10) . . . . ? 
C14A P1 C19 C22 82.1(8) . . . . ? 
C15 P1 C19 C22 -30.8(8) . . . . ? 
C15A P1 C19 C22 -19.7(14) . . . . ? 
C14 P1 C19 C22 74.4(7) . . . . ? 
C19A P1 C19 C22 -75.0(9) . . . . ? 
Ru1 P1 C19 C22 179.5(6) . . . . ? 
C14A P1 C19 C21 -39.0(7) . . . . ? 
C15 P1 C19 C21 -151.9(6) . . . . ? 
C15A P1 C19 C21 -140.8(12) . . . . ? 
C14 P1 C19 C21 -46.7(6) . . . . ? 
C19A P1 C19 C21 163.9(10) . . . . ? 
Ru1 P1 C19 C21 58.3(6) . . . . ? 
 
_diffrn_measured_fraction_theta_max    0.998 
_diffrn_reflns_theta_full              26.37 
_diffrn_measured_fraction_theta_full   0.998 
_refine_diff_density_max    1.335 
_refine_diff_density_min   -1.027 
_refine_diff_density_rms    0.090 
