# Supplementary material for: Catalytic transformation of alcohols to carboxylic acid salts and H2 using water as the oxygen atom source
Source: Springer Nature journal article supplement (doi:10.1038/nchem.1536), 2013-01-04
Supplement: 41557_2013_BFnchem1536_MOESM70_ESM.mol [file 41557_2013_BFnchem1536_MOESM70_ESM.mol]

  ChemDraw12121212422D

 30 27  0  0  0  0  0  0  0  0999 V2000
   -2.3348   -0.1531    0.0000 C   0  0  0  0  0  0  0  0  0  0  0  0
   -1.9223   -0.8676    0.0000 C   0  0  0  0  0  0  0  0  0  0  0  0
   -1.0973   -0.8676    0.0000 C   0  0  0  0  0  0  0  0  0  0  0  0
   -0.6848   -0.1531    0.0000 N   0  0  0  0  0  0  0  0  0  0  0  0
   -1.0973    0.5614    0.0000 C   0  0  0  0  0  0  0  0  0  0  0  0
   -1.9223    0.5614    0.0000 C   0  0  0  0  0  0  0  0  0  0  0  0
   -0.6848   -1.5821    0.0000 C   0  0  0  0  0  0  0  0  0  0  0  0
   -1.0973   -2.2965    0.0000 C   0  0  0  0  0  0  0  0  0  0  0  0
   -0.6848   -3.0110    0.0000 C   0  0  0  0  0  0  0  0  0  0  0  0
    0.1402   -3.0110    0.0000 C   0  0  0  0  0  0  0  0  0  0  0  0
    0.5527   -2.2965    0.0000 C   0  0  0  0  0  0  0  0  0  0  0  0
    0.1402   -1.5821    0.0000 N   0  0  0  0  0  0  0  0  0  0  0  0
   -0.6848    1.2758    0.0000 C   0  0  0  0  0  0  0  0  0  0  0  0
    0.1402    1.2758    0.0000 P   0  0  0  0  0  0  0  0  0  0  0  0
   -0.0132    2.1999    0.0000 C   0  0  0  0  0  0  0  0  0  0  0  0
   -0.7830    2.4888    0.0000 C   0  0  0  0  0  0  0  0  0  0  0  0
   -0.1479    3.0110    0.0000 C   0  0  0  0  0  0  0  0  0  0  0  0
    0.6219    2.7221    0.0000 C   0  0  0  0  0  0  0  0  0  0  0  0
    0.9314    1.6794    0.0000 C   0  0  0  0  0  0  0  0  0  0  0  0
    1.6828    1.3457    0.0000 C   0  0  0  0  0  0  0  0  0  0  0  0
    1.6478    2.0829    0.0000 C   0  0  0  0  0  0  0  0  0  0  0  0
    1.0355    2.4950    0.0000 C   0  0  0  0  0  0  0  0  0  0  0  0
    1.3663   -0.3250    0.0000 C   0  5  0  0  0  0  0  0  0  0  0  0
    1.8504   -0.9930    0.0000 O   0  3  0  0  0  0  0  0  0  0  0  0
    0.0543   -0.1531    0.0000 Ru  0  2  0  0  0  0  0  0  0  0  0  0
   -0.4729   -0.9760    0.0000 H   0  5  0  0  0  0  0  0  0  0  0  0
    0.8525    0.6021    0.0000 O   0  5  0  0  0  0  0  0  0  0  0  0
    1.7601    0.7377    0.0000 C   0  0  0  0  0  0  0  0  0  0  0  0
    2.2030    1.4337    0.0000 C   0  0  0  0  0  0  0  0  0  0  0  0
    2.3348    0.1458    0.0000 O   0  0  0  0  0  0  0  0  0  0  0  0
  1  2  1  0      
  2  3  2  0      
  3  4  1  0      
  4  5  2  0      
  5  6  1  0      
  6  1  2  0      
  3  7  1  0      
  7  8  2  0      
  8  9  1  0      
  9 10  2  0      
 10 11  1  0      
 11 12  2  0      
 12  7  1  0      
  5 13  1  0      
 13 14  1  0      
 14 15  1  0      
 14 19  1  0      
 15 16  1  0      
 15 17  1  0      
 15 18  1  0      
 19 20  1  0      
 19 21  1  0      
 19 22  1  0      
 23 24  3  0      
 27 28  1  0      
 28 29  1  0      
 28 30  2  0      
M  CHG  5  23  -1  24   1  25   2  26  -1  27  -1
M  END
