# Supplementary material for: Catalytic transformation of alcohols to carboxylic acid salts and H2 using water as the oxygen atom source
Source: Springer Nature journal article supplement (doi:10.1038/nchem.1536), 2013-01-04
Supplement: nchem.1536-s1.pdf [file nchem.1536-s1.pdf]

Browse Articles
| Nature Chemistry


Skip to main content

Thank you for visiting nature.com. You are using a browser version with limited support for CSS. To obtain
the best experience, we recommend you use a more up to date browser (or turn off compatibility mode in
Internet Explorer). In the meantime, to ensure continued support, we are displaying the site without styles
and JavaScript.

Advertisement


- View all journals
- Search
- Log in

- Explore content
- About the journal
- Publish with us

- Sign up for alerts
- RSS feed


1. nature
2. nature chemistry
3. browse articles

# Browse Articles

## Filter By:

Article Type

All

- All
- Addendum (15)
- Article (2057)
- Author Correction (34)
- Blogroll (78)
- Books & Arts (48)
- Comment (26)
- Commentary (26)
- Correction (18)
- Corrigendum (32)
- Editorial (56)
- Erratum (27)
- In Your Element (148)
- News & Views (827)
- Perspective (48)
- Publisher Correction (32)
- Q&A (20)
- Research Briefing (24)
- Research Highlights (593)
- Review Article (65)
- Thesis (142)

Year

All

- All
- 2024 (121)
- 2023 (286)
- 2022 (254)
- 2021 (237)
- 2020 (217)
- 2019 (202)
- 2018 (222)
- 2017 (205)
- 2016 (270)
- 2015 (267)
- 2014 (309)
- 2013 (288)
- 2012 (304)
- 2011 (277)
- 2010 (422)
- 2009 (383)
- 2008 (105)

- ### Dynamic crystal structure of a molecular framework

  X-ray diffraction analysis typically affords the static 3D structures of given compounds or materials, but to understand chemical processes, the visualization of fast structural changes is desirable. Time-resolved femtosecond crystallography has now been used to monitor the structural dynamics of a photoactive metal–organic framework.

  - Lauren E. Hatcher
  - Paul R. Raithby

  News & Views26 Apr 2024
- ### Precision synthesis and closed-loop recycling of ultrahigh-molar-mass cyclic polymers

  The precision synthesis of cyclic polymers with ultrahigh molar mass (UHMM) and circularity is challenging. Now, a method that involves superbase-mediated living linear-chain growth followed by macromolecular cyclization triggered by protic quenching enables the on-demand production of UHMM cyclic polymers with a narrow dispersity and closed-loop chemical recyclability.

  Research Briefing26 Apr 2024
- ### The search for Europan life

  Excited by the prospect of future missions to the Jupiter system, Bruce Gibb explores the chemistry of Jupiter’s moons and wonders whether there could be life on Europa.

  - Bruce C. Gibb

  Thesis26 Apr 2024
- ### Formylation boosts the performance of light-driven overcrowded alkene-derived rotary molecular motors

  Overcrowded alkene-derived molecular motors convert light and heat into chirality-directed unidirectional rotary motion, but the efficiency of their photochemical isomerization remains limited. Now formylation of the motor core has been shown to boost all aspects of motor photochemistry by improving photochemical efficiency, diminishing competing processes and redshifting absorption.

  - Jinyu Sheng
  - Wojciech Danowski
  - Ben L. Feringa

  Article26 Apr 2024
- ### Constructing artificial gap junctions to mediate intercellular signal and mass transport

  The construction of analogues of natural gap junctions would provide a bottom–up strategy for building intercellular communication pathways for synthetic cells. Now artificial intercellular gap junctions have been prepared from unimolecular tubular channels by mimicking the hydrophobic–hydrophilic–hydrophobic triblock structure of natural junction channels.

  - Yong-Hong Fu
  - Yi-Fei Hu
  - Jun-Li Hou

  Article24 Apr 2024
- ### Designer peptide–DNA cytoskeletons regulate the function of synthetic cells

  Advances in the development of cytoskeletal-like materials with modular structures and mechanics are pivotal for the engineering of synthetic cells. Now actin-mimetic supramolecular peptide networks have been designed using programmable peptide–DNA crosslinkers, giving rise to tunable tactoid-shaped bundles and mechanical properties that control spatial localization, the diffusion of payloads and shape changes within artificial cells.

  - Margaret L. Daly
  - Kengo Nishi
  - Ronit Freeman

  ArticleOpen Access23 Apr 2024
- ### Mechanical scission of a knotted polymer

  Knots reduce the tensile strength of macroscopic threads and fibres. Now it has been shown that the presence of a well-defined overhand knot in a polymer chain can substantially increase the rate of scission of the polymer under tension, as deformation of the polymer backbone induced by the tightening knot activates otherwise unreactive covalent bonds.

  - Min Zhang
  - Robert Nixon
  - David A. Leigh

  ArticleOpen Access22 Apr 2024
- ### Proton-triggered topological transformation in superbase-mediated selective polymerization enables access to ultrahigh-molar-mass cyclic polymers

  The selective synthesis of ultrahigh-molar-mass (UHMM) cyclic polymers from direct polymerization is elusive. Using a chemically recyclable polythioester as a model, it has now been shown that a common superbase mediates living linear-chain growth, followed by proton-triggered linear-to-cyclic topological transformation, producing UHMM cyclic polymers with a narrow dispersity.

  - Li Zhou
  - Liam T. Reilly
  - Eugene Y.-X. Chen

  Article22 Apr 2024
- ### Upcycling chlorinated trash into synthetic organic treasure

  Chlorine-containing waste streams pose potential risks to human health and the environment, so their remediation represents a significant challenge. Now, chlorinated wastes have been successfully repurposed as chlorinating reagents for use in the preparation of organic chemicals and pharmaceutical ingredients.

  - Andrew Jordan

  News & Views19 Apr 2024
- ### Assembling the pieces to improve catalysis

  Understanding the ways by which metal-containing catalysts carry out a reaction is a chemical puzzle. Now, investigations of a multi-metallic molecular system uncover how the self-assembly of molecular catalysts facilitates cooperation between active species and improves the conversion of water to hydrogen gas.

  - Ana Sonea
  - Jeffrey J. Warren

  News & Views19 Apr 2024
- ### Deprotonated 2-thiolimidazole serves as a metal-free electrocatalyst for selective acetylene hydrogenation

  Although metal-free catalysts, featuring defined active sites, represent alternatives to scarce or problematic metals, metal-free compounds rarely show activities as promising as metal-based materials. Now deprotonated 2-thiolimidazole is shown to serve as a metal-free electrocatalyst for selective acetylene hydrogenation and achieves competitive performances with metal-based catalysts.

  - Lei Zhang
  - Rui Bai
  - Jian Zhang

  Article19 Apr 2024
- ### Organic solvent enhances oxidative folding of disulfide-rich proteins

  Natural protein folding takes place in aqueous cell environments. Now, it has been found that proteins in a water-free environment undergo faster and more efficient folding.

  - Shay Laps
  - Norman Metanis

  News & Views18 Apr 2024
- ### A *para*- to *meta*-isomerization of phenols

  Phenols and their derivatives are ubiquitous in nature and important within the chemical industry. Their properties are linked to their substitution patterns, but *meta*-isomers are underrepresented due to the difficulty of their synthesis. Now we address this challenge by describing a 1,2-transposition of phenols that enables a formal *para*- to *meta*-isomerization.

  - Simon Edelmann
  - Jean-Philip Lumb

  Article17 Apr 2024
- ### Stereoretentive enantioconvergent reactions

  Enantioconvergent reactions convert both enantiomers of a racemic starting material into a single enantioenriched product. All currently known enantioconvergent processes necessitate the loss or partial loss of the racemic substrate’s stereochemical information. Now, an alternative approach has been developed that proceeds with full retention of the racemic substrate’s configuration.

  - Steven H. Bennett
  - Jacob S. Bestwick
  - Andrew L. Lawrence

  ArticleOpen Access17 Apr 2024
- ### Stereodivergent photobiocatalytic radical cyclization through the repurposing and directed evolution of fatty acid photodecarboxylases

  Despite their intriguing photochemical activities, natural photoenzymes have not yet been repurposed for new-to-nature activities. Now, by leveraging the strongly oxidizing excited-state flavoquinone cofactor, fatty acid photodecarboxylases were engineered to catalyse unnatural decarboxylative radical cyclization with excellent chemo-, enantio- and diastereoselectivities.

  - Shuyun Ju
  - Dian Li
  - Yang Yang

  Article17 Apr 2024
- ### Mechanically triggered on-demand degradation of polymers synthesized by radical polymerizations

  Radical polymerizations yield polymers that cannot easily be degraded. The co-polymerization of cyclobutene-based monomers with conventional vinyl monomers has now been shown to result in co-polymers with cyclobutane mechanophores in their backbone, which facilitate on-demand degradation through a combination of mechanical activation and hydrolysis. This approach offers a promising avenue for the degradation of all-carbon-bond-backbone polymers.

  - Peng Liu
  - Sètuhn Jimaja
  - Nico Bruns

  ArticleOpen Access12 Apr 2024
- ### Masked acid chlorides for proximity labelling of RNA

  A non-radical proximity labelling platform — BAP-seq — is presented that uses subcellular-localized BS2 esterase to convert unreactive enol-based probes into highly reactive acid chlorides in situ to label nearby RNAs. When paired with click-handle-mediated enrichment and sequencing, this chemistry enables high-resolution spatial mapping of RNAs across subcellular compartments.

  Research Briefing09 Apr 2024
- ### Bioorthogonal masked acylating agents for proximity-dependent RNA labelling

  RNA localization is key to regulating cellular function but is challenging to measure in an unbiased manner. Now a combination of enol-masked acylating probes with a bioorthogonal esterase to locally unmask them provides a non-radical RNA proximity labelling platform—termed BAP-seq—that enables the generation of high-resolution spatial maps of RNA.

  - Shubhashree Pani
  - Tian Qiu
  - Bryan C. Dickinson

  Article09 Apr 2024
- ### Upcycling of polyethylene to gasoline through a self-supplied hydrogen strategy in a layered self-pillared zeolite

  The development of new methodologies to convert plastics into fuels without relying on noble metal-based catalysts is desirable. Now it is shown that a layered self-pillared zeolite enables the conversion of polyethylene to gasoline with a selectivity of 99% and yields of >80% without the need to use external hydrogen.

  - Ziyu Cen
  - Xue Han
  - Buxing Han

  ArticleOpen Access09 Apr 2024
- ### Copper-catalysed asymmetric hydroboration of alkenes with 1,2-benzazaborines to access chiral naphthalene isosteres

  Chiral 1,2-benzazaborines are promising isosteres of naphthalene, but rarely explored due to the lack of efficient synthetic methods. Now, the copper-catalysed enantioselective hydroboration of alkenes with 1,2-benzazaborines has been developed, providing a general platform for the atom-economic and efficient construction of diverse chiral 1,2-benzazaborine compounds bearing a 2-carbon-stereogenic centre or allene skeleton.

  - Wanlan Su
  - Jide Zhu
  - Qiuling Song

  Article08 Apr 2024

- Previous page
- page 1
- page 2
- page 3
- …
- page 219
- Next page

## Explore content

- Research articles
- Reviews & Analysis
- News & Comment
- Current issue
- Collections

- Follow us on Facebook
- Follow us on Twitter
- Sign up for alerts
- RSS feed


## About the journal

- Aims & Scope
- Journal Information
- Journal Metrics
- About the Editors
- Our publishing models
- Editorial Values Statement
- Editorial Policies
- Content Types
- Web Feeds
- Contact
- Research Cross-Journal Editorial Team
- Reviews Cross-Journal Editorial Team


## Publish with us

- Submission Guidelines
- For Reviewers
- Language editing services
- Submit manuscript

## Search

Search articles by subject, keyword or author

Show results from

All journals
This journal

Search

Advanced search

### Quick links

- Explore articles by subject
- Find a job
- Guide to authors
- Editorial policies

Nature Chemistry (*Nat. Chem.*)

ISSN 1755-4349 (online)

ISSN 1755-4330 (print)

## nature.com sitemap

### About Nature Portfolio

- About us
- Press releases
- Press office
- Contact us

### Discover content

- Journals A-Z
- Articles by subject
- protocols.io
- Nature Index

### Publishing policies

- Nature portfolio policies
- Open access

### Author & Researcher services

- Reprints & permissions
- Research data
- Language editing
- Scientific editing
- Nature Masterclasses
- Research Solutions

### Libraries & institutions

- Librarian service & tools
- Librarian portal
- Open research
- Recommend to library

### Advertising & partnerships

- Advertising
- Partnerships & Services
- Media kits
- Branded
  content

### Professional development

- Nature Careers
- Nature 
  Conferences

### Regional websites

- Nature Africa
- Nature China
- Nature India
- Nature Italy
- Nature Japan
- Nature Middle East

- Privacy
  Policy
- Use
  of cookies
- Your privacy choices/Manage cookies
- Legal
  notice
- Accessibility
  statement
- Terms & Conditions
- Your US state privacy rights

© 2024 Springer Nature Limited

xml version="1.0" encoding="UTF-8"?
